# Supplementary material for: Identification of Differential Roles of MicroRNA‐33a and ‐33b During Atherosclerosis Progression With Genetically Modified Mice
Source: PubMed Central journal article supplement — J Am Heart Assoc. 2019 Jun 27;8(13):e012609. doi: 10.1161/JAHA.119.012609 (PMC6662357; doi:10.1161/jaha.119.012609), 2019-06-27
Supplement: JAH3-8-e012609-s001.pdf [file JAH3-8-e012609-s001.pdf]

# **Supplemental Material**

**Table S1. List of the primers for real-time qPCR assay used in this study.**

|                        |                          |
|------------------------|--------------------------|
| miR-33a sense          | GGCACTACTTCTGATCCTTC     |
| miR-33a antisense (WT) | CAACTACAATGCACCACAGCTG   |
| miR-33a antisense (KO) | TTGGGATCCAGAATTCGTGATTAA |
| miR-33b sense          | GTACCCACTGGTAGAGCATATC   |
| miR-33b antisense (WT) | CATCACTGAAGCACTGCATCTGC  |
| miR-33b antisense (KI) | AAGTGGATCCAGAATTCGTGA    |

**Table S2. List of the primers for mice genotyping used in this study.**

|              | Sense                   | Antisense                |
|--------------|-------------------------|--------------------------|
| Abca1        | AACAGTTTGTGGCCCTTTTG    | AGTTCCAGGCTGGGGTACTT     |
| Abcg1        | GATTGGGAATGAAGCCAAGA    | CAGTAGGCCACAGGGAACAT     |
| Abcg5        | AAAACCTTACCCACGGTTCC    | GTTACTCGCCTCAGCAGGAC     |
| Abcg8        | CCTGATCCGTCGTCAGATTT    | CCATGGCCGTAGTAAAGGAA     |
| Actb         | GATCTGGCACCACACCTTCT    | GGGGTGTGGAAGGTCTCAAA     |
| ApoB         | CTCCAAAGAGGCCAGTCAAG    | GAGAGGCTTGCAAGTTGACC     |
| ApoE         | CAGAGCTCCCAAGTCACACA    | CCCGTATCTCCTCTGTGCTC     |
| CCR2         | ATCTGCTCAACTTGGCCATC    | CCCAAAGACCCACTCATTG      |
| Cpt1a        | GATCTACAATTCCCCTCTGCTCT | TAGAGCCAGACCTTGAAGTAACG  |
| Crot         | TACTTTTACCACGGCCGAAC    | GACGGTCAAATCCTTTTCCA     |
| Cyp7a1       | GAGCCCTGAAGCAATGAAAG    | GCTGTCCGGATATTCAAGGA     |
| F4/80        | CCCAGCTTATGCCACCTGCA    | GGAGCCATTCAAGACAAAGCC    |
| Fasn         | GGGTTCTAGCCAGCAGAGTCTA  | TGAGATGTGGATACCACCAGAG   |
| Hmgcr        | CGTAACCCAAAGGGTCAAGA    | GACCCAAGGAAACCTTAGCC     |
| Hmgcs2       | AGAAATCCCTGGCTCGGGTTG   | AGCTTTAGACCCCTGAAGGC     |
| Idol         | CGAAGCATAAGGAGCTGGAG    | CCTCACAGCATGCCACTCTA     |
| IL-10        | AAATAAGAGCAAGGCAGTGGAG  | TCATTCATGGCCTTG TAGACAC  |
| Il-1 $\beta$ | TCAGGCAGGCAGTATCACTCA   | GGAAGGTCCACGGGAAAGAC     |
| Il-6         | ACCACGGCCTTCCCTACTTC    | AGATTGTTTTCTGCAAGTGCATCA |
| Ldlr         | ATTGGGTTGATTCCAAACTCC   | ATTCACATCTGAACCCGTGAG    |
| Lrp1         | CTGAAGGCTCCCGAGTACCAG   | GTAGGAGATTGTGCCCGTGT     |
| MCP1         | CTGGATCGGAACCAAATGAG    | TGAGGTGGTTGTGGAAAAGG     |
| Mvd          | AAGCAGACGGGCAGTACAGT    | CCTGGAGGTGTCATTGAGGT     |
| Pcsk9        | TCCATTGGGAAGTGAAGAC     | ACCTGCTCTGAAGGACCTGA     |
| Scd1         | GCGATACACTCTGGTGCTCA    | CCCAGGGAAACCAGGATATT     |
| Srebf1       | TAGAGCATATCCCCCAGGTG    | GGTACGGGCCACAAGAAGTA     |
| Srebf2       | GTGGAGCAGTCTCAACGTCA    | TGGTAGGTCTCACCAGGAG      |
| TNF $\alpha$ | CCAGACCCTCACACTCAGATC   | CACTTGGTGGTTTGCTACGAC    |

Figure S1. Liver miR transcriptome obtained from miR-33 KO mice and miR-33 WT mice.

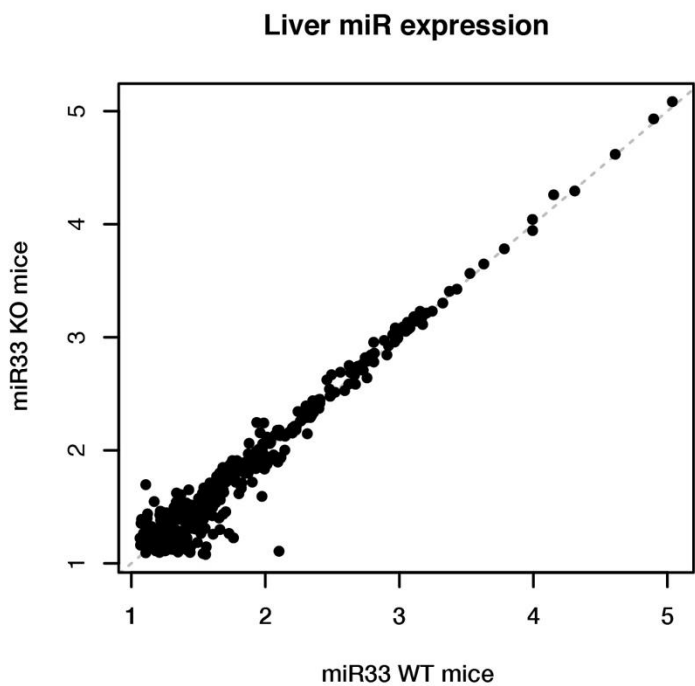

**Figure S2. Dysregulated metabolite and miR-33 target genes on the KEGG pathways. (Glucagon signaling pathway).**

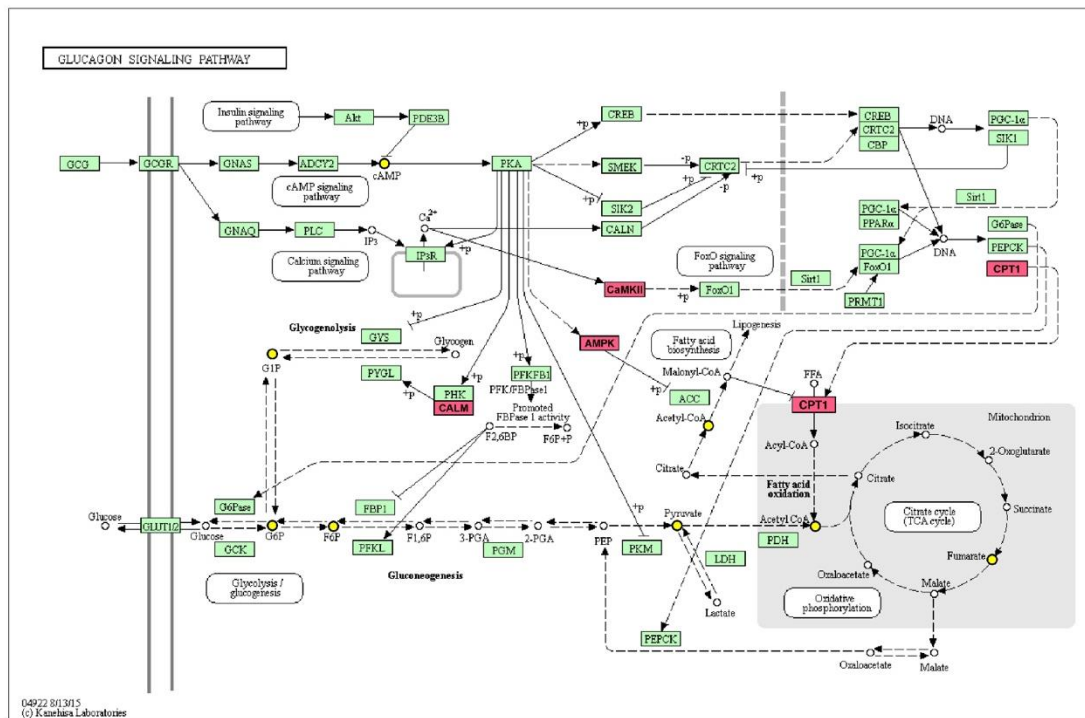

Yellow circles indicate dysregulated metabolites. Predicted miR-33 targets are highlighted in red.

**Figure S3. Dysregulated metabolite and miR-33 target genes on the KEGG pathway (Insulin secretion pathway).**

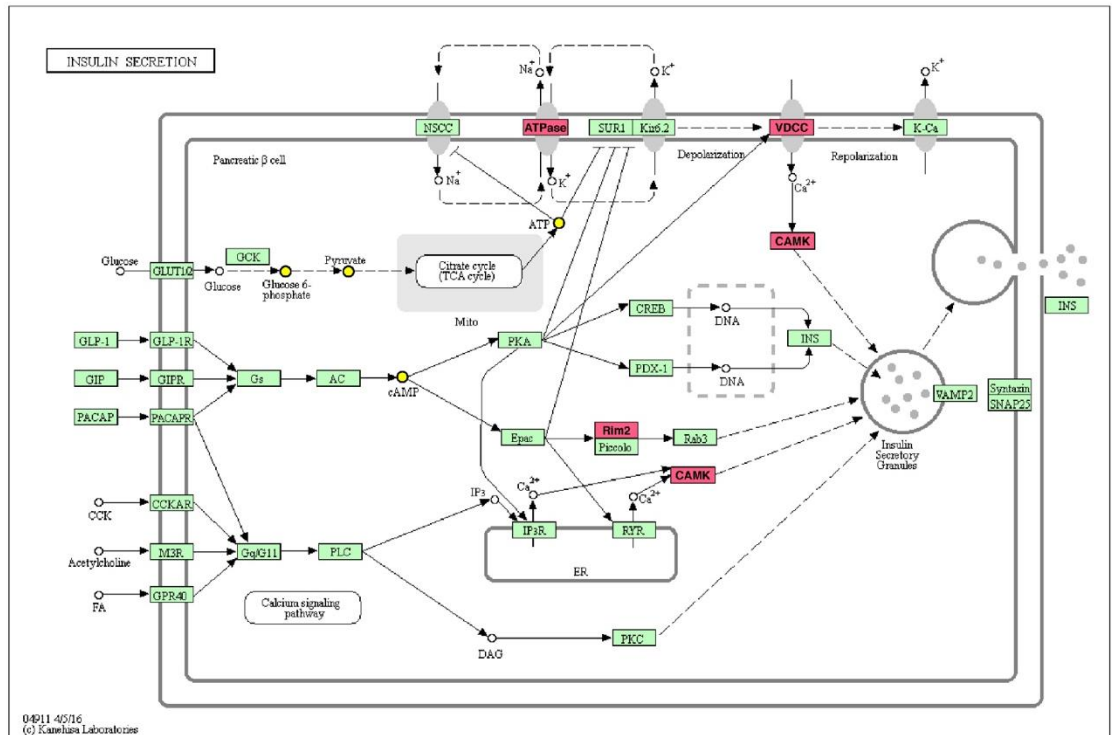

Yellow circles indicate dysregulated metabolites. Predicted miR-33 targets are highlighted in red.

**Figure S4. Dysregulated metabolite and miR-33 target genes on the KEGG pathways (AMPK signaling pathway).**

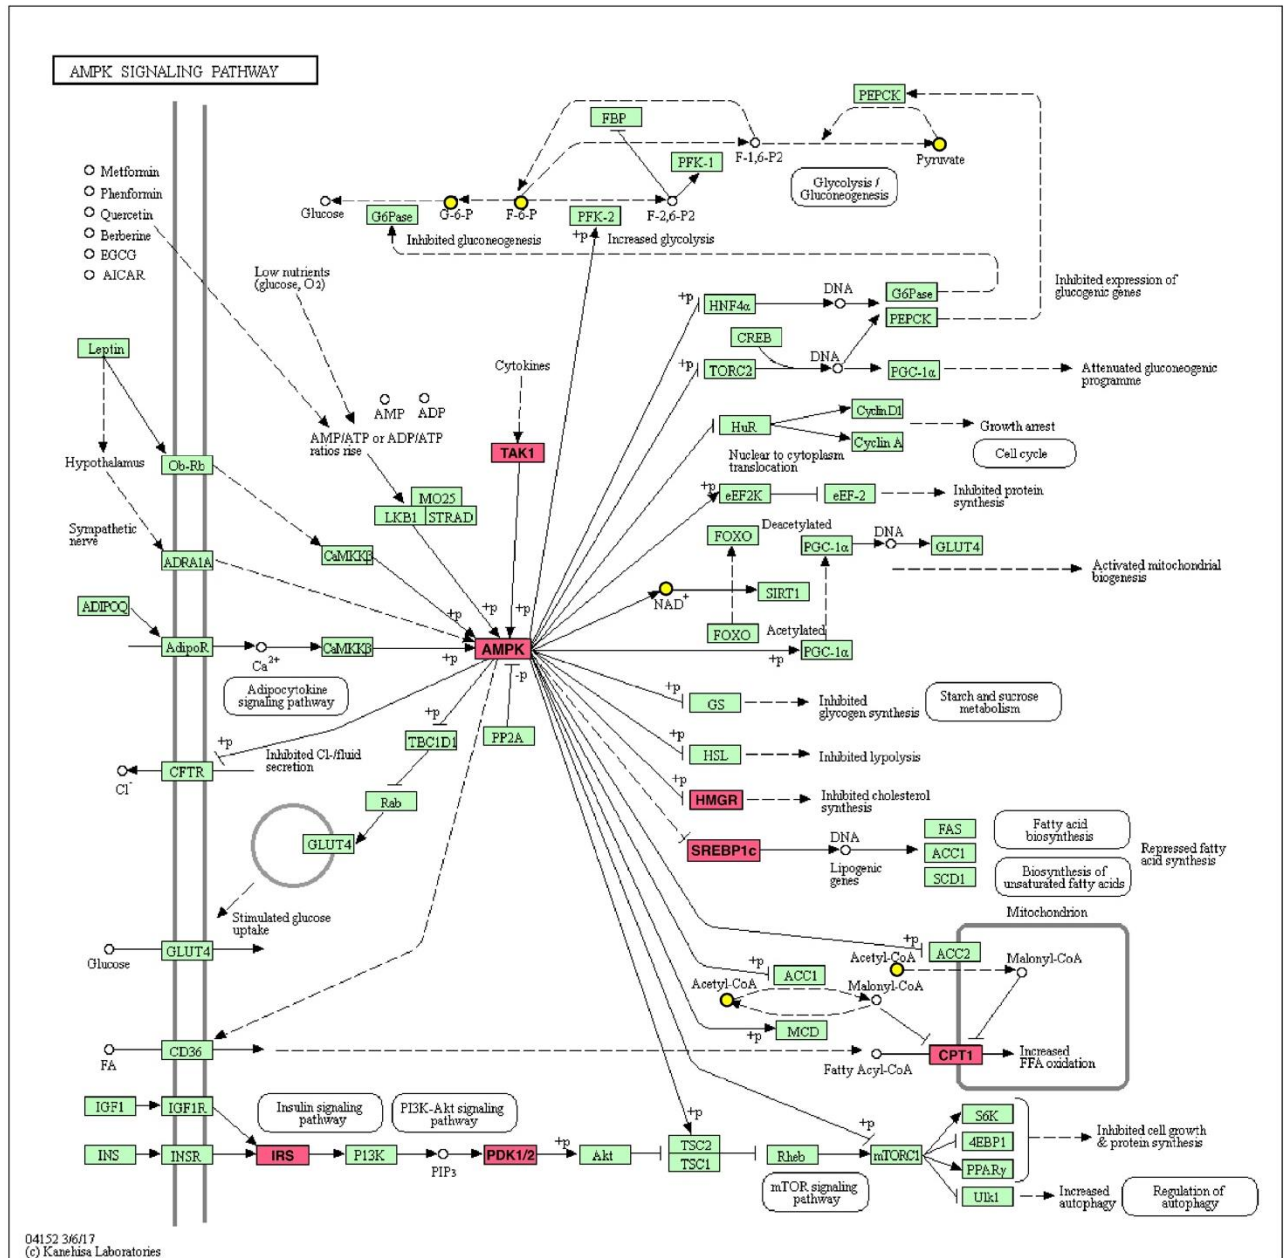

Yellow circles indicate dysregulated metabolites. Predicted miR-33 targets are highlighted in red.
